# Supplementary material
Source: ML conference proceedings conference paper supplement (https://proceedings.mlr.press/v54/raj17a.html)
Supplement: Supplementary file [file raj17a-supp.pdf]

# Appendix

**Proof of Lemma 2.1.** Since unitary transformations preserve dot-products, i.e.,  $\langle T(x), T(y) \rangle = \langle x, y \rangle$ , we need to show that a group element acting on the image  $I : \mathbb{R}^2 \mapsto \mathbb{R}$  as  $T_g[I(x)] = |J_g|^{-1/2} I(T_g^{-1}(x))$ ,  $\forall x$  is a unitary transformation.

Let  $J_g$  be the Jacobian of the transformation  $T_g$ , with determinant  $|J_g|$ . We have

$$\begin{aligned} \|I(T_g^{-1}(\cdot))\|^2 &= \int I^2(T_g^{-1}(x)) dx \\ &= \int I^2(z) |J_g| dz, \quad \text{substituting } z = T_g^{-1}(x) \Rightarrow dx = |J_g| dz \\ &= |J_g| \|I(\cdot)\|^2 \end{aligned}$$

Hence the transformation given as  $T_g[I(\cdot)] = |J_g|^{-1/2} I(T_g^{-1}(\cdot))$  is unitary and thus  $\langle T_g(I), T_g(I') \rangle = \langle I, I' \rangle$  for two images  $I$  and  $I'$ .  $\square$

**Proof of Theorem 3.1.** We first define the notion of *U-statistics* [21].

**U-statistics** - Let  $g : \mathbb{R}^2 \rightarrow \mathbb{R}$  be a symmetric function of its arguments. Given an i.i.d. sequence  $X_1, X_2 \dots X_k$  of  $k (\geq 2)$  random variables, the quantity  $U := \frac{1}{n(n-1)} \sum_{i \neq j, i, j=1}^n g(X_i, X_j)$  is known as a pairwise **U-statistics**. If  $\theta(P) = \mathbb{E}_{X_1, X_2 \sim P} g(X_1, X_2)$  then  $U$  is an unbiased estimate of  $\theta(P)$ .

Our goal is to bound

$$\sup_{x, y \in X} \left| \langle \psi_{RF}(x), \psi_{RF}(y) \rangle - k_{q,G}(x, y) \right|$$

where

$$\psi_{RF}(x) = \frac{1}{r} \sum_{i=1}^r z(g_i x), x \in X \subset \mathbb{R}^d.$$

We work with  $z(\cdot) = \sqrt{2/s} [\cos(\langle \omega_1, \cdot \rangle + b_1), \dots, \cos(\langle \omega_s, \cdot \rangle + b_s)] \in \mathbb{R}^s$  with  $b_i \sim \text{Unif}(0, 2\pi)$  as in [33].

Let  $\widehat{k}_{q,G}(x, y) := \frac{1}{r^2} \sum_{i, j=1}^{r^2} k(g_i x, g_j y)$  and  $\widetilde{k}_{q,G}(x, y) := \frac{1}{r(r-1)} \sum_{i \neq j, i, j=1}^{r^2} k(g_i x, g_j y)$ .

Using the triangle inequality we have

$$\begin{aligned} \sup_{x, y \in X} \left| \langle \psi_{RF}(x), \psi_{RF}(y) \rangle - k_{q,G}(x, y) \right| &\leq \underbrace{\sup_{x, y \in X} \left| \langle \psi_{RF}(x), \psi_{RF}(y) \rangle - \widehat{k}_{q,G}(x, y) \right|}_A \\ &\quad + \underbrace{\sup_{x, y \in X} \left| \widehat{k}_{q,G}(x, y) - k_{q,G}(x, y) \right|}_B + \underbrace{\sup_{x, y \in X} \left| \widehat{k}_{q,G}(x, y) - \widetilde{k}_{q,G}(x, y) \right|}_C \end{aligned}$$

**Bounding A.**

$$A := \sup_{x, y \in X} \left| \frac{1}{r^2} \sum_{i, j} (\langle z(g_i x), z(g_j y) \rangle - k(g_i x, g_j y)) \right|$$

Let us define  $f_{ij}(x, y) := \langle z(g_i x), z(g_j y) \rangle - k(g_i x, g_j y)$ , and  $f(x, y) = 1/r^2 \sum_{i, j} f_{ij}(x, y)$ . Since each of the  $s$  independent random variables in the summand of  $1/r^2 \sum_{i, j} \langle z(g_i x), z(g_j y) \rangle = \frac{1}{s} \sum_{k=1}^s \left( \frac{1}{r^2} \right.$

$\sum_{i,j} 2 \cos(\langle \omega_k, g_i x \rangle + b_k) \cos(\langle \omega_k, g_j y \rangle + b_k)$  is bounded by  $[-2, 2]$ , using Hoeffding's inequality for a given pair  $x, y$ , we have

$$\Pr[|f(x, y)| \geq \varepsilon/4] \leq 2 \exp(-s\varepsilon^2/128).$$

To obtain a uniform convergence guarantee over  $X$ , we follow the arguments in [33], relying on covering the space with an  $\varepsilon$ -net and Lipschitz continuity of the function  $f(x, y)$ .

Since  $X$  is compact, we can find an  $\varepsilon$ -net that covers  $X$  with  $N_X = \left(\frac{2 \text{diam}(X)}{\eta}\right)^d$  balls of radius  $\eta$  [12]. Let  $\{c_k\}_{k=1}^{N_X}$  be the centers of these balls, and let  $L_f$  denote the Lipschitz constant of  $f(\cdot, \cdot)$ , i.e.,  $|f(x, y) - f(c_k, c_l)| \leq L_f \|(x, y) - (c_k, c_l)\|$  for all  $x, y, c_k, c_l \in X$ . For any  $x, y \in X$ , there exists a pair of centers  $c_k, c_l$  such that  $\|(x, y) - (c_k, c_l)\| < \sqrt{2}\eta$ . We will have  $|f(x, y)| < \varepsilon/2$  for all  $x, y$  if (i)  $|f(c_k, c_l)| < \frac{\varepsilon}{4}$ ,  $\forall c_k, c_l$ , and (ii)  $L_f < \frac{\varepsilon}{4\sqrt{2}\eta}$ .

We immediately get the following by applying union bound for all the center pairs  $(c_k, c_l)$

$$\Pr[\cup_{k,l} |f(c_k, c_l)| \geq \varepsilon/4] \leq 2N_X^2 \exp(-s\varepsilon^2/128). \quad (9)$$

We use Markov inequality to bound the Lipschitz constant of  $f$ . By definition, we have  $L_f = \sup_{x,y} \|\nabla_{x,y} f(x, y)\| = \|\nabla_{x,y} f(x^*, y^*)\|$ , where  $\nabla_{x,y} f(x, y) = \begin{pmatrix} \nabla_x f(x, y) \\ \nabla_y f(x, y) \end{pmatrix}$ . We also have  $\mathbb{E}_{\omega \sim p} \nabla_{x,y} \langle z(g_i x), z(g_j y) \rangle = \nabla_{x,y} k(g_i x, g_j y)$ . It follows that

$$\begin{aligned} \mathbb{E}_{\omega \sim p} \|\nabla_{x,y} f(x^*, y^*)\|^2 &= \mathbb{E}_{\omega \sim p} \left\| \frac{1}{r^2} \sum_{i,j=1}^r \nabla_{x,y} \langle z(g_i x^*), z(g_j y^*) \rangle \right\|^2 - \left\| \frac{1}{r^2} \sum_{i,j=1}^r \nabla_{x,y} k(g_i x^*, g_j y^*) \right\|^2 \\ &\leq \mathbb{E}_{\omega \sim p} \left\| \frac{1}{r^2} \sum_{i,j=1}^r \nabla_{x,y} \langle z(g_i x^*), z(g_j y^*) \rangle \right\|^2 \\ &\leq \mathbb{E}_{\omega \sim p} \left( \frac{1}{r^2} \sum_{i,j=1}^r \|\nabla_{x,y} \langle z(g_i x^*), z(g_j y^*) \rangle\| \right)^2 \\ &\leq 2 \mathbb{E}_{\omega \sim p} \sup_{x,y,g_i,g_j} \|\nabla_x \langle z(g_i x), z(g_j y) \rangle\|^2 \\ &\leq 2 \mathbb{E}_{\omega \sim p} \sup_{x,g} \left( \frac{1}{s} \sum_{k=1}^s \|\nabla_x T_g(x) \omega_k\| \right)^2 \\ &\leq 2 \mathbb{E}_{\omega \sim p} \sup_{x,g} \left( \frac{1}{s} \sum_{k=1}^s \|\nabla_x T_g(x)\|_2 \|\omega_k\| \right)^2 \\ &= 2 \mathbb{E}_{\omega \sim p} \sup_{x,g} \|\nabla_x T_g(x)\|_2^2 \frac{1}{s^2} \sum_{k=1}^s \sum_{l=1}^s \|\omega_k\| \|\omega_l\| \\ &= 2 \sup_{x,g} \|\nabla_x T_g(x)\|_2^2 \frac{1}{s^2} \sum_{k=1}^s \sum_{l=1}^s \mathbb{E}_{\omega \sim p} \|\omega_k\| \|\omega_l\| \\ &= 2 \sup_{x,g} \|\nabla_x T_g(x)\|_2^2 \frac{1}{s^2} \left( s \mathbb{E}_{\omega \sim p} \|\omega\|^2 + \sum_{k,l=1, k \neq l}^s (\mathbb{E}_{\omega \sim p} \|\omega\|)^2 \right) \quad (\omega_k \text{ i.i.d.}) \\ &\leq 2 \sup_{x,g} \|\nabla_x T_g(x)\|_2^2 \frac{1}{s^2} \left( s \mathbb{E}_{\omega \sim p} \|\omega\|^2 + \sum_{k,l=1, k \neq l}^s \mathbb{E}_{\omega \sim p} \|\omega\|^2 \right) \quad (\text{Jensen's inequality}) \end{aligned}$$

$$\leq 2\sigma_p^2 \sup_{x \in X, g \in G} \|\nabla_x T_g(x)\|_2^2,$$

where  $\sigma_p^2 = \mathbb{E}(\omega^\top \omega)$ , and  $T_g(x) = gx$  denotes the transformation corresponding to the group action. If we assume the group action to be linear, i.e.,  $T_g(x + y) = T_g(x) + T_g(y)$  and  $T_g(\alpha x) = \alpha T_g(x)$ , which holds for all group transformations considered in this work (e.g., rotation, translation, scaling or general affine transformations on image  $x$ ; permutations of  $x$ ), we can bound  $\|\nabla_x T_g(x)\|_2$  as

$$\begin{aligned} \|\nabla_x T_g(x)\|_2 &= \sup_{u: \|u\|=1} \|\nabla_x T_g(x)u\| \\ &= \sup_{u: \|u\|=1} \left\| \lim_{h \rightarrow 0} \frac{T_g(x + hu) - T_g(x)}{h} \right\| \quad (\text{directional derivative of vector valued function } T_g(\cdot)) \\ &= \sup_{u: \|u\|=1} \|T_g(u)\| = 1 \\ &\quad (\text{since } T_g(\cdot) \text{ is either unitary or is converted to unitary by construction (see Lemma 2.1)}) \end{aligned}$$

Using Markov inequality,  $\Pr[L_f^2 \geq \varepsilon] \leq \mathbb{E}(L_f^2)/\varepsilon$ , hence we get

$$\Pr \left[ L_f \geq \frac{\varepsilon}{4\sqrt{2}\eta} \right] \leq \frac{64\sigma_p^2\eta^2}{\varepsilon^2}.$$

Combining Eq. (9) with the above result on Lipschitz continuity, we get

$$\Pr \left[ \sup_{x,y} |f(x,y)| \leq \varepsilon/2 \right] \geq 1 - 2N_X^2 \exp(-s\varepsilon^2/128) - \frac{64\sigma_p^2\eta^2}{\varepsilon^2}. \quad (10)$$

## Bounding B.

As defined earlier,  $\tilde{k}_{q,G}(x,y) := \frac{1}{r(r-1)} \sum_{i \neq j, i,j=1}^r k(g_i x, g_j y)$ . From the result of U-statistics literature [21], it is easy to see that  $\mathbb{E}(\tilde{k}_{q,G}(x,y)) = k_{q,G}(x,y)$ .

Since  $g_1, g_2 \dots g_r$  are i.i.d samples, we can consider  $\tilde{k}_{q,G}(x,y)$  as function of  $r$  random variables  $(g_1, g_2, \dots g_r)$ . Denote  $\tilde{k}_{q,G}(x,y)$  as  $f(g_1, g_2, \dots g_r)$ . Now if a variable  $g_p$  is changed to  $g'_p$  then we can bound the absolute difference of the changed and the original function. For the rbf kernel,  $|k(g_p x, g_j y) - k(g'_p x, g_j y)| \leq 1$

$$\begin{aligned} |f(g_1, g_2, \dots g_p, \dots g_r) - f(g_1, \dots g_{p-1}, g'_p, g_{p+1} \dots g_r)| &= \frac{1}{r(r-1)} \left| \sum_{j=1, j \neq p}^r k(g_p x, g_j y) - k(g'_p x, g_j y) \right| \\ &\leq \frac{1}{r(r-1)} \sum_{j=1, j \neq p}^r |k(g_p x, g_j y) - k(g'_p x, g_j y)| \\ &\leq \frac{(r-1)}{r(r-1)} = \frac{1}{r} \end{aligned}$$

Using bounded difference inequality

$$\Pr \left[ \left| f(g_1, g_2, \dots g_r) - \mathbb{E}[f(g_1, g_2 \dots g_r)] \right| \geq \frac{\varepsilon}{2} \right] \leq 2 \exp \left( \frac{-r\varepsilon^2}{2} \right).$$

The above bound holds for a given pair  $x, y$ . Similar to the earlier segment for bounding the first term  $A$ , we use the  $\varepsilon$ -net covering of  $X$  and Lipschitz continuity arguments to get a uniform convergence guarantee. Using a union bound on all pairs of centers, we have

$$\Pr \left[ \bigcup_{k,\ell=1}^{N_X} \left| \mathbb{E}[k(gc_k, g'c_\ell)] - \frac{1}{r(r-1)} \sum_{i,j=1, i \neq j}^r k(g_i c_k, g_j c_\ell) \right| > \frac{\varepsilon}{2} \right] \leq 2N_X^2 \exp \left( \frac{-r\varepsilon^2}{2} \right). \quad (11)$$

In order to extend the bound from the centers  $c_i$  to all  $x \in X$ , we use the Lipschitz continuity argument. Let

$$h(x, y) = k_{q,G}(x, y) - \tilde{k}_{q,G}(x, y).$$

Let  $L_h$  denote the Lipschitz constant of  $h(\cdot, \cdot)$ , i.e.,  $|h(x, y) - h(c_k, c_l)| \leq L_h \|(x, y) - (c_k, c_l)\|$  for all  $x, y, c_k, c_l \in X$ . By the definition of  $\varepsilon$ -net, for any  $x, y \in X$ , there exists a pair of centers  $c_k, c_l$  such that  $\|(x, y) - (c_k, c_l)\| < \sqrt{2}\eta$ . We will have  $|h(x, y)| < \varepsilon/2$  for all  $x, y$  if (i)  $|h(c_k, c_l)| < \frac{\varepsilon}{4}$ ,  $\forall c_k, c_l$ , and (ii)  $L_h < \frac{\varepsilon}{4\sqrt{2}\eta}$ .

We will again use Markov inequality to bound the Lipschitz constant of  $h$ . By definition, we have  $L_h = \sup_{x,y} \|\nabla_{x,y} h(x, y)\| = \|\nabla_{x,y} h(x^*, y^*)\|$ , where  $\nabla_{x,y} h(x, y) = \begin{pmatrix} \nabla_x h(x, y) \\ \nabla_y h(x, y) \end{pmatrix}$ . We also have  $\mathbb{E}_{\omega \sim p} \nabla_{x,y} \tilde{k}_{q,G}(x, y) = \nabla_{x,y} k_{q,G}(x, y)$ . It follows that

$$\begin{aligned} \mathbb{E}_{g_1, \dots, g_r} \|\nabla_{x,y} h(x^*, y^*)\|^2 &= \mathbb{E}_{g_1, \dots, g_r} \|\nabla_{x,y} \tilde{k}_{q,G}(x^*, y^*)\|^2 - \|\nabla_{x,y} k_{q,G}(x^*, y^*)\|^2 \\ &\leq \mathbb{E}_{g_1, \dots, g_r} \|\nabla_{x,y} \tilde{k}_{q,G}(x^*, y^*)\|^2 \\ &= \mathbb{E}_{g_1, \dots, g_r} \left\| \frac{1}{r(r-1)} \sum_{i \neq j} \nabla_{x,y} k(g_i x^*, g_j y^*) \right\|^2. \end{aligned}$$

Noting  $T_{g_i}(x) = g_i x$ , and  $k(x, y) = \exp -\frac{1}{2\sigma^2} \|x - y\|^2$ , we have

$$\begin{aligned} \nabla_x k(g_i x, g_j y) &= \nabla_x k(T_{g_i}(x), T_{g_j}(y)) \\ &= -\frac{1}{\sigma^2} \nabla_x T_{g_i}(x) (g_i x - g_j y) \exp \left( -\frac{1}{2\sigma^2} \|g_i x - g_j y\|^2 \right). \end{aligned}$$

Continuing

$$\begin{aligned} \left\| \frac{1}{r(r-1)} \sum_{i \neq j} \nabla_{x,y} k(g_i x, g_j y) \right\| &\leq \frac{1}{r(r-1)} \sum_{i \neq j} \left\| \nabla_{x,y} k(g_i x, g_j y) \right\| \\ &\leq \frac{\sqrt{2}}{r(r-1)} \sup_x \sum_{i \neq j} \left\| \nabla_x k(g_i x, g_j y) \right\| \quad (\text{using symmetry of } k(\cdot, \cdot)) \\ &= \frac{\sqrt{2}}{r(r-1)\sigma^2} \sup_x \sum_{i \neq j} k(g_i x, g_j y) \left\| \nabla_x T_{g_i}(x) (g_i x - g_j y) \right\| \\ &\leq \frac{\sqrt{2}}{r(r-1)\sigma^2} \sum_{i \neq j} k(g_i x, g_j y) \|\nabla_x T_{g_i}(x)\|_2 \|g_i x - g_j y\| \\ &\leq \frac{\sqrt{2}e^{-1/2}}{\sigma} \sup_{x \in X, g \in G} \|\nabla_x T_g(x)\|_2 \quad (\text{using } \sup_{z \geq 0} z e^{-z^2/(2\sigma^2)} = \sigma e^{-1/2}) \\ &\leq \frac{\sqrt{2}e^{-1/2}}{\sigma} \quad (\text{using linearity and unitarity of } T_g(\cdot) \text{ as before}) \end{aligned}$$

It follows that

$$\mathbb{E}(L_h^2) \leq \frac{2}{\sigma^2 e}.$$

Now using Markov inequality we have

$$\mathbb{P} \left[ L_h > \sqrt{t} \right] \leq \frac{\mathbb{E}(L_h^2)}{t},$$

Hence we have for  $t = \left(\frac{\varepsilon}{4\sqrt{2}\eta}\right)^2$ ,

$$\mathbb{P}\left[L_h > \frac{\varepsilon}{4\sqrt{2}\eta}\right] \leq \frac{32\eta^2\mathbb{E}((L_h)^2)}{\varepsilon^2} \leq \frac{64\eta^2}{e\sigma^2\varepsilon^2},$$

Hence

$$\Pr[B \leq \varepsilon/2] \geq 1 - 2(N_X)^2 \exp\left(\frac{-r\varepsilon^2}{2}\right) - \frac{64\eta^2}{e\sigma^2\varepsilon^2}.$$

**Bounding C.**

$$\begin{aligned} \left|\tilde{k}_{q,G}(x,y) - \widehat{k}_{q,G}(x,y)\right| &= \left|\frac{1}{r(r-1)} \sum_{i,j=1,i \neq j}^r k(g_i x, g_j y) - \frac{1}{r^2} \sum_{i,j=1}^r k(g_i x, g_j y)\right| \\ &= \left|\left(\frac{1}{r(r-1)} - \frac{1}{r^2}\right) \sum_{i,j=1,i \neq j}^r k(g_i x, g_j y) - \frac{1}{r^2} \sum_{i,j=1,i=j}^r k(g_i x, g_j y)\right| \\ &\leq \max\left(\frac{1}{r^2(r-1)} \sum_{i,j=1,i \neq j}^r k(g_i x, g_j y), \frac{1}{r^2} \sum_{i,j=1,i=j}^r k(g_i x, g_j y)\right) \quad (\text{since } k(\cdot, \cdot) \geq 0) \\ &\leq \frac{1}{r} \quad (\text{as Gaussian kernel } k(\cdot, \cdot) \leq 1) \end{aligned}$$

Finally we have

$$\sup_{x,y \in X} \left| \langle \psi_{RF}(x), \psi_{RF}(y) \rangle - k_{q,G}(x,y) \right| \leq A + B + C \leq \varepsilon + \frac{1}{r}$$

with a probability at least  $1 - 2N_X^2 \exp\left(\frac{-s\varepsilon^2}{128}\right) - 2N_X^2 \exp\left(\frac{-r\varepsilon^2}{2}\right) - \left(\frac{64\eta^2 d}{\varepsilon^2 \sigma^2}\right) - \left(\frac{64\eta^2}{e\varepsilon^2 \sigma^2}\right)$ , noting that  $\sigma_p^2 = d/\sigma^2$  for the Gaussian kernel  $k(x,y) = e^{-\frac{\|x-y\|^2}{2\sigma^2}}$ .

Let

$$\begin{aligned} p &= 1 - 2N_X^2 \exp\left(\frac{-s\varepsilon^2}{128}\right) - 2N_X^2 \exp\left(\frac{-r\varepsilon^2}{2}\right) - \left(\frac{64\eta^2 d}{\varepsilon^2 \sigma^2}\right) - \left(\frac{64\eta^2}{e\varepsilon^2 \sigma^2}\right) \\ &= 1 - 2\left(\frac{2\text{diam}(X)}{\eta}\right)^{2d} \exp\left(\frac{-s\varepsilon^2}{128}\right) - 2\left(\frac{2\text{diam}(X)}{\eta}\right)^{2d} \exp\left(\frac{-r\varepsilon^2}{2}\right) - \left(\frac{64\eta^2 d}{\varepsilon^2 \sigma^2}\right) - \left(\frac{64\eta^2}{e\varepsilon^2 \sigma^2}\right) \\ &\geq 1 - 2\eta^{-2d} \left( (2\text{diam}(X))^{2d} \exp\left(\frac{-r\varepsilon^2}{2}\right) + (2\text{diam}(X))^{2d} \exp\left(\frac{-s\varepsilon^2}{128}\right) \right) - \eta^2 \left(\frac{64(d+1)}{\varepsilon^2 \sigma^2}\right). \end{aligned}$$

The above probability is of the form of  $1 - (\kappa_1 + \kappa_2)\eta^{-2d} - \kappa_3\eta^2$  where  $\kappa_1 = 2(2\text{diam}(X))^{2d} \exp\left(\frac{-r\varepsilon^2}{2}\right)$ ,  $\kappa_2 = 2(2\text{diam}(X))^{2d} \exp\left(\frac{-s\varepsilon^2}{128}\right)$  and  $\kappa_3 = \left(\frac{64(d+1)}{\varepsilon^2 \sigma^2}\right)$ . Choose  $\eta = \left(\frac{\kappa_1 + \kappa_2}{\kappa_3}\right)^{\frac{1}{2(d+1)}}$

Hence  $p \geq 1 - 2(\kappa_1 + \kappa_2)^{\frac{1}{d+1}} \kappa_3^{\frac{d}{d+1}}$ .

For given  $\delta_1, \delta_2 \in (0, 1)$ , we conclude that for fixed constants  $C_1, C_2$ , for

$$r \geq \frac{C_1 d}{\varepsilon^2} \log(\text{diam}(X)/\delta_1),$$

$$s \geq \frac{C_2 d}{\varepsilon^2} (\log(\text{diam}(X)/\delta_2)),$$

we have

$$\sup_{x,y \in X} \left| \langle \psi_{RF}(x), \psi_{RF}(y) \rangle - k_{q,G}(x,y) \right| \leq \varepsilon + \frac{1}{r},$$

with probability  $1 - \left(\frac{64(d+1)}{\varepsilon^2 \sigma^2}\right)^{\frac{d}{d+1}} (\delta_1 + \delta_2)^{\frac{2d}{d+1}}$ .

**Proof of Theorem 3.2.** We give here the proof of Theorem 3.2.

**Lemma A.1** (Lemma 4 [35]). - Let  $\mathbf{X} = \{x_1, x_2 \dots x_K\}$  be iid random variables in a ball  $\mathcal{H}$  of radius  $M$  centered around the origin in a Hilbert space. Denote their average by  $\bar{\mathbf{X}} = \frac{1}{K} \sum_{i=1}^K x_i$ . Then for any  $\delta > 0$ , with probability at least  $1 - \delta$ ,

$$\|\bar{\mathbf{X}} - \mathbb{E}\bar{\mathbf{X}}\| \leq \frac{M}{\sqrt{K}} \left(1 + \sqrt{2 \log \frac{1}{\delta}}\right)$$

*Proof.* For proof, see [35]. □

Now consider a space of functions,

$$\mathcal{F}_p \equiv \left\{ f(x) = \int_{\Omega} \alpha(\omega) \int_G \phi(gx, \omega) q(g) d\nu(g) d\omega \mid |\alpha(\omega)| \leq Cp(\omega) \right\},$$

and also consider another space of functions,

$$\hat{\mathcal{F}}_p \equiv \left\{ \hat{f}(x) = \sum_{k=1}^s \alpha_k \frac{1}{r} \sum_{i=1}^r \phi(g_i x, \omega_k) \mid |\alpha_k| \leq \frac{C}{s} \right\},$$

where  $\phi(gx, \omega) = e^{-i\langle gx, \omega \rangle}$ .

**Lemma A.2.** Let  $\mu$  be a measure defined on  $X$ , and  $f^*$  a function in  $\mathcal{F}_p$ . If  $\omega_1, \omega_2 \dots \omega_s$  are iid samples from  $p(\omega)$ , then for  $\delta_1, \delta_2 > 0$ , there exists a function  $\hat{f} \in \hat{\mathcal{F}}_p$  such that

$$\|f^* - \hat{f}\|_{\mathcal{L}_2(X, \mu)} \leq \frac{C}{\sqrt{s}} \left(1 + \sqrt{2 \log \frac{1}{\delta_1}}\right) + \frac{C}{\sqrt{r}} \left(1 + \sqrt{2 \log \frac{1}{\delta_2}}\right),$$

with probability at least  $1 - \delta_1 - \delta_2$ .

*Proof.* Consider  $\psi(x; \omega_k) = \int_G \phi(gx, \omega_k) q(g) d\nu(g)$ . Let  $\tilde{f}_k = \beta_k \psi(\cdot; \omega_k)$ ,  $k = 1 \dots s$ , with  $\beta_k = \frac{\alpha(\omega_k)}{p(\omega_k)}$ . Hence  $\mathbb{E}_{\omega_k \sim p} \tilde{f}_k = f^*$ .

Define  $\tilde{f}(x) = \frac{1}{s} \sum_{k=1}^s \tilde{f}_k$ . Let  $\hat{f}_k(x) = \beta_k \hat{\psi}(x; \omega_k)$ , where  $\hat{\psi}(x; \omega_k) = \frac{1}{r} \sum_{i=1}^r \phi(g_i x, \omega_k)$  is the empirical estimate of  $\psi(x; \omega_k)$ . Define  $\hat{f}(x) = \frac{1}{s} \sum_{k=1}^s \hat{f}_k(x)$ . We have  $\mathbb{E}_{g_i \sim q} \hat{f}(x) = \tilde{f}(x)$ .

$$\|f^* - \hat{f}\|_{\mathcal{L}_2(X, \mu)} \leq \|f^* - \tilde{f}\|_{\mathcal{L}_2(X, \mu)} + \|\tilde{f} - \hat{f}\|_{\mathcal{L}_2(X, \mu)}$$

From Lemma 1 of [35], with probability  $1 - \delta_1$ ,

$$\|f^* - \tilde{f}\|_{\mathcal{L}_2(X, \mu)} \leq \frac{C}{\sqrt{s}} \left(1 + \sqrt{2 \log \frac{1}{\delta_1}}\right).$$

Since  $\hat{f}(x) = \frac{1}{r} \sum_{i=1}^r \sum_{k=1}^s \frac{\beta_k}{s} \phi(g_i x, \omega_k)$  and  $\mathbb{E}_{g_i \sim q} \hat{f}(x) = \tilde{f}(x)$  with  $g_i$  iid (and  $\{\omega_k\}_{k=1}^s$  fixed beforehand), we can apply Lemma A.1 with

$$M = \left\| \sum_{k=1}^s \frac{\beta_k}{s} \phi(g_i x, \omega_k) \right\| \leq \sum_{k=1}^s \left| \frac{\beta_k}{s} \right| \|\phi(g_i x, \omega_k)\| \leq \sum_{k=1}^s \left| \frac{\beta_k}{s} \right| \leq C.$$

We conclude that with a probability at least  $1 - \delta_2$ ,

$$\|\tilde{f} - \hat{f}\|_{\mathcal{L}_2(X, \mu)} \leq \frac{C}{\sqrt{r}} \left(1 + \sqrt{2 \log \frac{1}{\delta_2}}\right).$$

Hence, with probability at least  $1 - \delta_1 - \delta_2$ , we have

$$\|f^* - \hat{f}\|_{\mathcal{L}_2(X, \mu)} \leq \frac{C}{\sqrt{s}} \left(1 + \sqrt{2 \log \frac{1}{\delta_1}}\right) + \frac{C}{\sqrt{r}} \left(1 + \sqrt{2 \log \frac{1}{\delta_2}}\right)$$

□

**Theorem A.3** (Estimation error [35]). *Let  $\mathcal{F}$  be a bounded class of functions,  $\sup_{x \in X} |f(x)| \leq C$  for all  $f \in \mathcal{F}$ . Let  $V(y_i f(x_i))$  be an  $L$ -Lipschitz loss. Then with probability  $1 - \delta$ , with respect to training samples  $\{x_i, y_i\}_{i=1,2,\dots,N}$  ( $iid \sim P$ ), every  $f$  satisfies*

$$\mathcal{E}_V(f) \leq \hat{\mathcal{E}}_V(f) + 4LR_N(\mathcal{F}) + \frac{2|V(0)|}{\sqrt{N}} + LC\sqrt{\frac{1}{2N} \log \frac{1}{\delta}},$$

where  $\mathcal{R}_N(\mathcal{F})$  is the Rademacher complexity of the class  $\mathcal{F}$ :

$$\mathcal{R}_N(\mathcal{F}) = \mathbb{E}_{x, \sigma} \left[ \sup_{f \in \mathcal{F}} \left| \frac{1}{N} \sum_{i=1}^N \sigma_i f(x_i) \right| \right],$$

and  $\sigma_i$  are iid symmetric Bernoulli random variables taking value in  $\{-1, 1\}$ , with equal probability and are independent from  $x_i$ .

*Proof.* See in [35].

□

Let  $f \in \mathcal{F}_p$  and  $\hat{f} \in \hat{\mathcal{F}}_p$  then the approximation error is bounded as

$$\begin{aligned} \mathcal{E}_V(\hat{f}) - \mathcal{E}_V(f) &\leq \mathbb{E}_{(x,y) \sim P} \left| V(y\hat{f}(x)) - V(yf(x)) \right| \\ &\leq L\mathbb{E}|\hat{f}(x) - f(x)| \\ &\leq L\sqrt{\mathbb{E}(\hat{f}(x) - f(x))^2} \quad (\text{Jensen's inequality for } \sqrt{\cdot} \text{ concave function}) \\ &\leq LC \left( \frac{1}{\sqrt{s}} \left(1 + \sqrt{2 \log \frac{1}{\delta_1}}\right) + \frac{1}{\sqrt{r}} \left(1 + \sqrt{2 \log \frac{1}{\delta_2}}\right) \right), \end{aligned}$$

with probability at least  $1 - \delta_1 - \delta_2$ . Now let  $f_N^* = \arg \min_{f \in \hat{\mathcal{F}}_p} \hat{\mathcal{E}}_V(f)$  and  $\tilde{f} = \arg \min_{f \in \hat{\mathcal{F}}_p} \mathcal{E}_V(f)$ . We have

$$\begin{aligned} \mathcal{E}_V(f_N^*) - \min_{f \in \hat{\mathcal{F}}_p} \mathcal{E}_V(f) &= \hat{\mathcal{E}}_V(f_N^*) - \mathcal{E}_V(\tilde{f}) + \mathcal{E}_V(\tilde{f}) - \min_{f \in \hat{\mathcal{F}}_p} \mathcal{E}_V(f) \\ &\leq 2 \sup_{\tilde{f} \in \hat{\mathcal{F}}_p} \left| \mathcal{E}_V(\tilde{f}) - \hat{\mathcal{E}}_V(\tilde{f}) \right| + L \left( \frac{C}{\sqrt{s}} \left(1 + \sqrt{2 \log \frac{1}{\delta_1}}\right) + \frac{C}{\sqrt{r}} \left(1 + \sqrt{2 \log \frac{1}{\delta_2}}\right) \right) \\ &\leq 2 \left( 4LR_N(\mathcal{F}) + \frac{2|V(0)|}{\sqrt{N}} + LC\sqrt{\frac{1}{2N} \log \frac{1}{\delta}} \right) + \\ &\quad LC \left( \frac{1}{\sqrt{s}} \left(1 + \sqrt{2 \log \frac{1}{\delta_1}}\right) + \frac{1}{\sqrt{r}} \left(1 + \sqrt{2 \log \frac{1}{\delta_2}}\right) \right), \end{aligned}$$

with probability at least  $1 - \delta - \delta_1 - \delta_2$ . It is easy to show that  $\mathcal{R}_N(\mathcal{F}) \leq \frac{C}{\sqrt{N}}$ . Taking  $\delta = \delta_1 = \delta_2$  yields the statement of the theorem.

□
